# Supplementary material for: Copolymerization of l-lactide and ε-caprolactone catalyzed by mono-and dinuclear salen aluminum complexes bearing bulky 6,6′-dimethylbipheyl-bridge: random and tapered copolymer
Source: Royal Society of Chemistry journal article supplement (doi:10.1039/c6ra07374c), 2016-01-01
Supplement: c6ra07374c1.pdf [file c6ra07374c1.pdf]

## Supporting Information

Copolymerization of *L*-Lactide and  $\epsilon$ -Caprolactone Catalyzed by Mono- and  
Dinuclear Salen Aluminum Complexes Bearing Bulky  
6,6'-Dimethylbiphenyl-Bridge: Random and Tapered Copolymer

*Chao Kan, Haiyan Ma\**

*Shanghai Key Laboratory of Functional Materials Chemistry and Laboratory of  
Organometallic Chemistry, East China University of Science and Technology, 130 Meilong  
Road, Shanghai 200237, P. R. China*

Haiyan Ma: [haiyanma@ecust.edu.cn](mailto:haiyanma@ecust.edu.cn)

\* To whom correspondence should be addressed. Tel./Fax: +86 21 64253519. E-mail:  
[haiyanma@ecust.edu.cn](mailto:haiyanma@ecust.edu.cn).

## Table of contents

### 1. NMR spectra and thermal properties of polymers

**Figure S1.** The  $^1\text{H}$  NMR spectrum of poly(*L*-LA-*ran*- $\epsilon$ -CL) produced by complex **3**. ( $\text{CDCl}_3$ , 400 MHz)

**Figure S2.** The  $^1\text{H}$  NMR spectrum of poly(*L*-LA-*tap*- $\epsilon$ -CL) produced by complex **6**. ( $\text{CDCl}_3$ , 400 MHz)

**Figure S3.** The DSC curves of poly(*L*-LA-*ran*- $\epsilon$ -CL) produced by complex **3**. (top: LA/CL = 6 : 4; middle: LA/CL = 5 : 5; bottom: LA/CL = 4 : 6)

**Figure S4.** The DSC curves of poly(*L*-LA-*tap*- $\epsilon$ -CL) produced by complex **6**.

### 2. Determination of reactivity ratios

## 1. NMR spectra and thermal properties of the copolymers

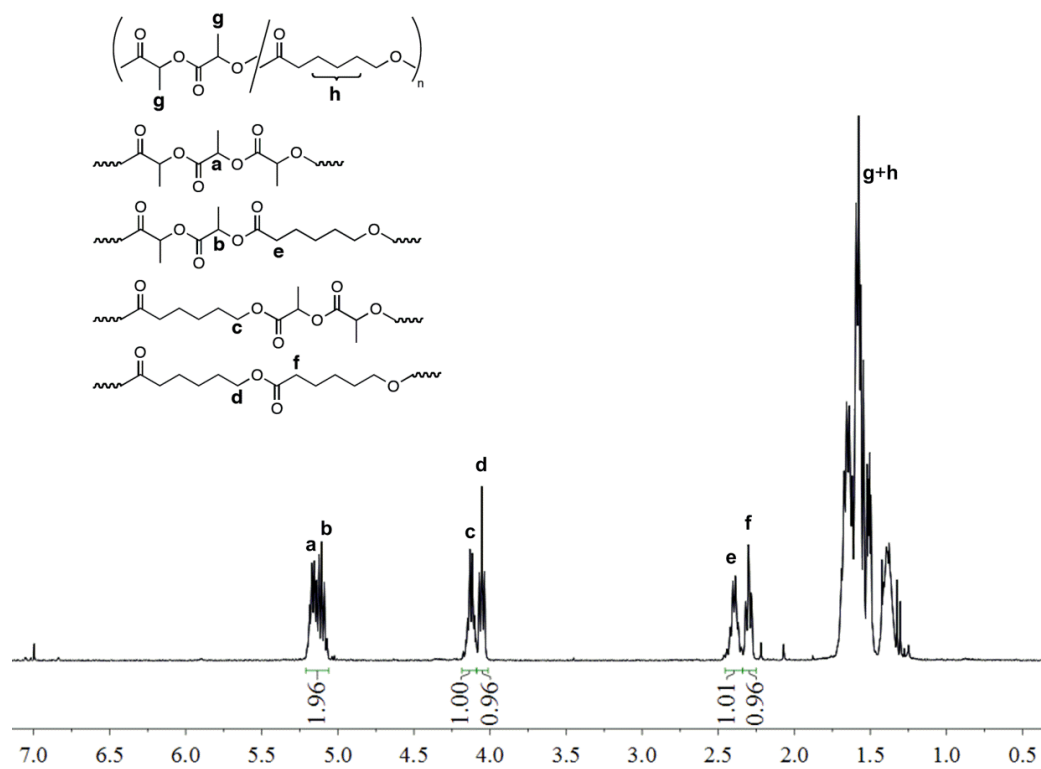

**Figure S1.** The <sup>1</sup>H NMR spectrum of poly(*L*-LA-*ran*-ε-CL) produced by complex **3**. (CDCl<sub>3</sub>, 400 MHz)

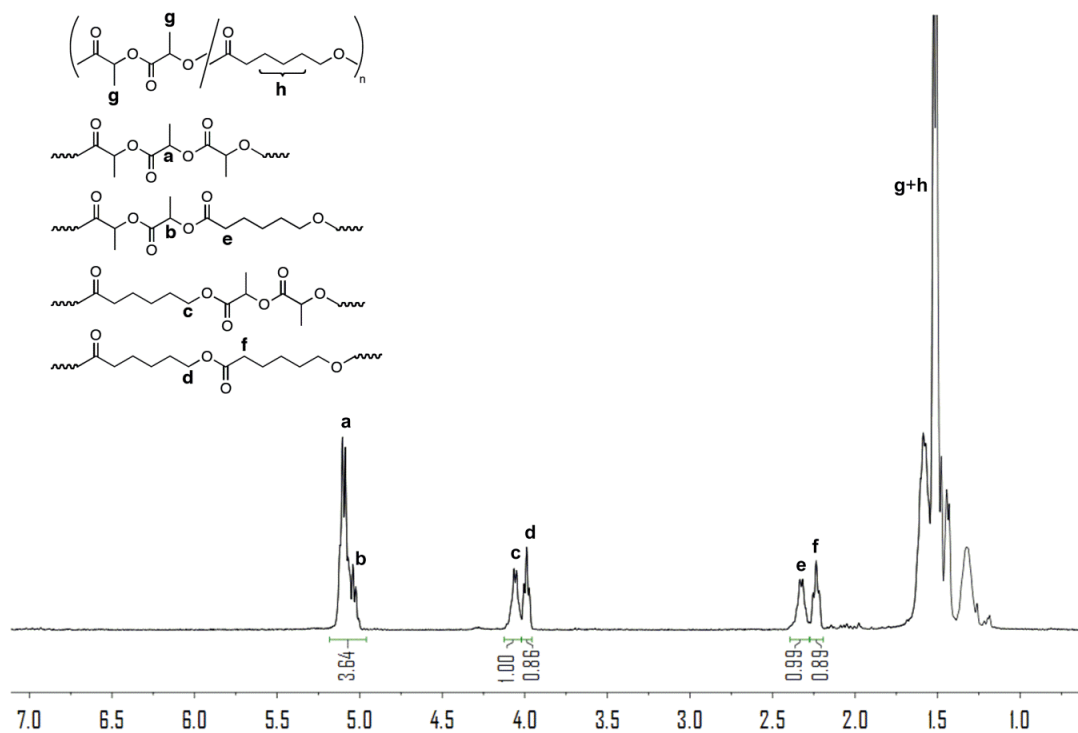

**Figure S2.** The <sup>1</sup>H NMR spectrum of poly(*L*-LA-*tap*-ε-CL) produced by complex **6**. (CDCl<sub>3</sub>, 400 MHz)

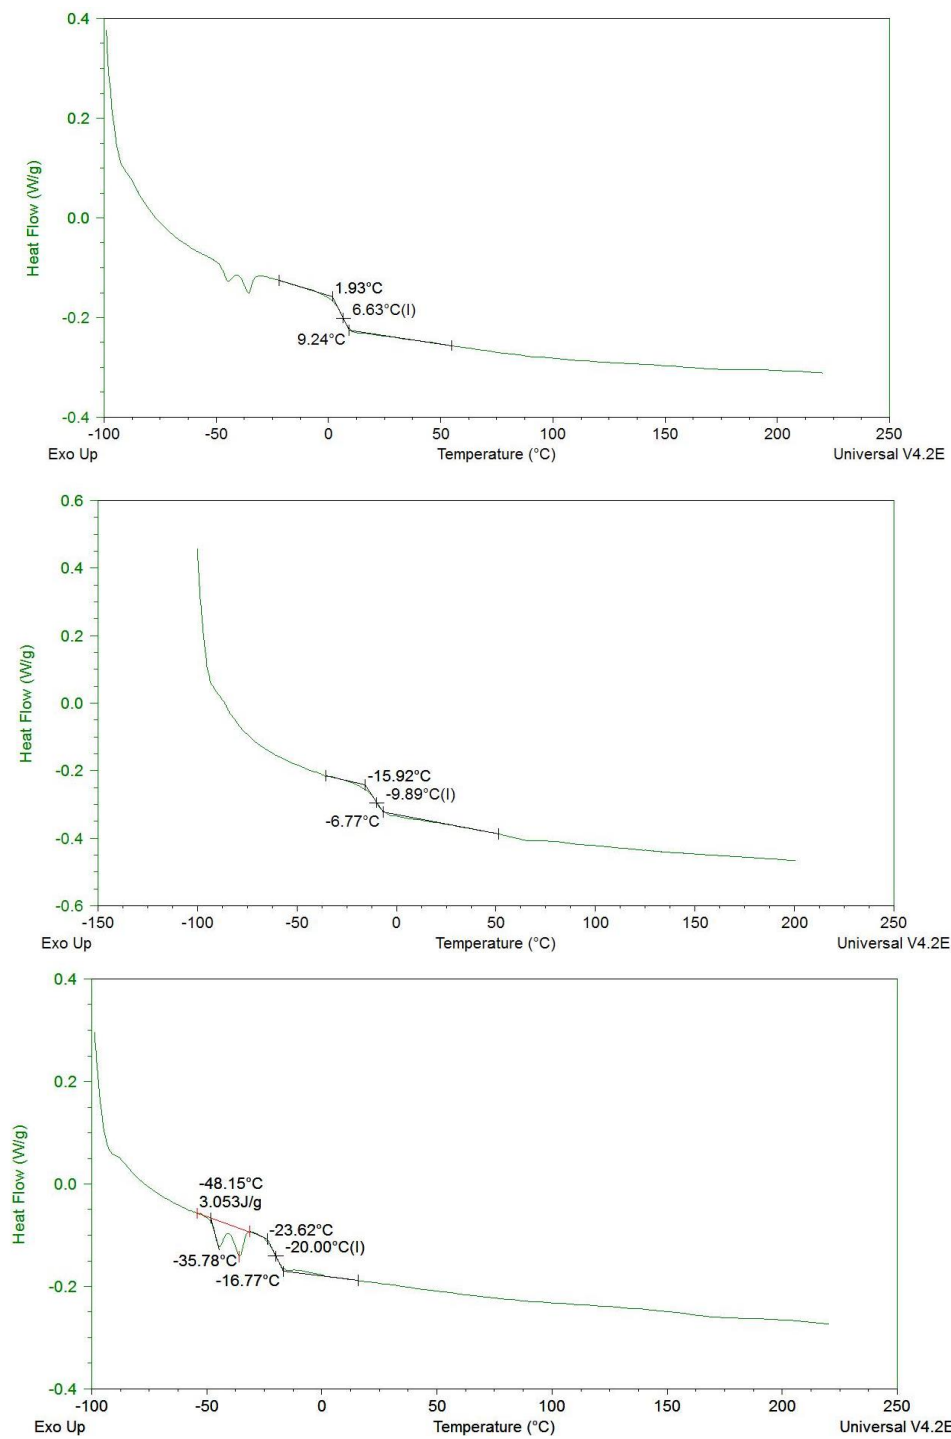

**Figure S3.** The DSC curves of poly(L-LA-ran-ε-CL) produced by complex 3. (top: LA/CL = 6 : 4; middle: LA/CL = 5 : 5; bottom: LA/CL = 4 : 6)

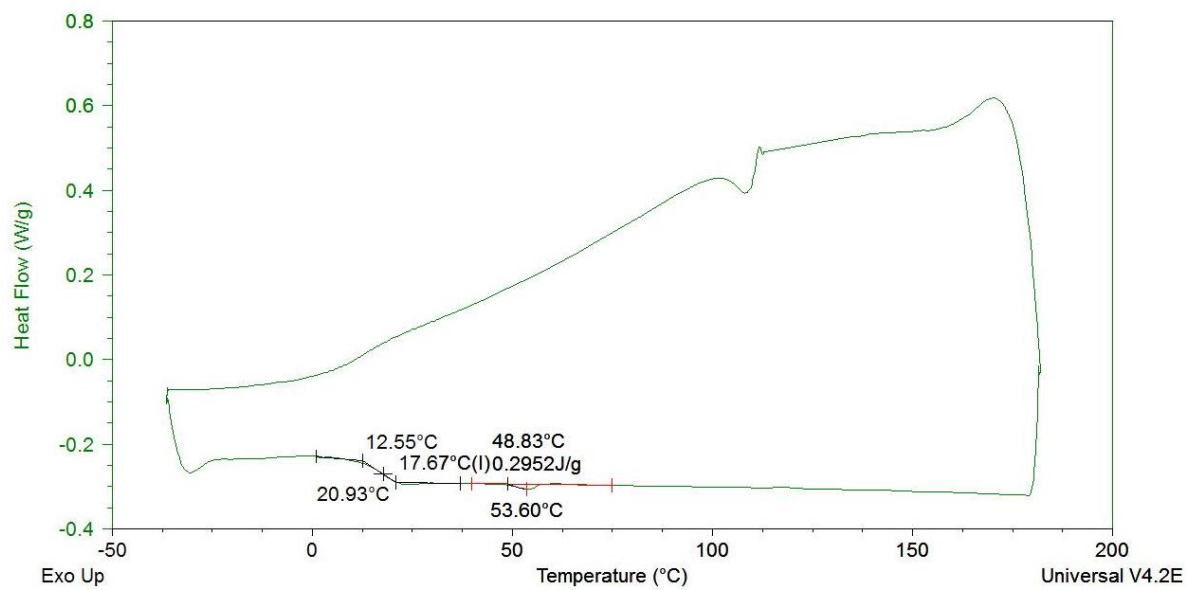

**Figure S4.** The DSC curves of poly(*L*-LA-*tap*- $\epsilon$ -CL) produced by complex **6**.

2. Determination of reactivity ratios: the reactivity ratios were calculated using the nonlinear least squares (NLLS) method, carrying out the copolymerizations at low conversion with different ratios of the two monomers.

**Table S1.** Copolymerization entries at low monomer conversions<sup>a</sup>

| $f_{[LA]}^b$ | $f_{[CL]}^b$ | Conv. <sup>c</sup><br>LA | Conv. <sup>c</sup><br>CL | $F_{LA}^d$ | $F_{CL}^d$ | $x$   | $y$   | $\alpha$ | $F$   | $G$    | $F/\alpha+F$ | $G/\alpha+F$ |
|--------------|--------------|--------------------------|--------------------------|------------|------------|-------|-------|----------|-------|--------|--------------|--------------|
| 0.190        | 0.810        | 3.08                     | 2.48                     | 0.226      | 0.774      | 0.235 | 0.292 | 0.222    | 0.188 | -0.569 | 0.460        | -1.387       |
| 0.400        | 0.600        | 14.32                    | 11.65                    | 0.450      | 0.550      | 0.667 | 0.818 | 0.222    | 0.543 | -0.148 | 0.710        | -0.194       |
| 0.505        | 0.495        | 8.93                     | 8.11                     | 0.534      | 0.466      | 1.020 | 1.146 | 0.222    | 0.926 | 0.131  | 0.807        | 0.114        |
| 0.600        | 0.400        | 7.08                     | 7.05                     | 0.603      | 0.397      | 1.500 | 1.519 | 0.222    | 1.481 | 0.512  | 0.870        | 0.301        |
| 0.708        | 0.292        | 4.35                     | 3.54                     | 0.747      | 0.253      | 2.424 | 2.953 | 0.222    | 1.991 | 1.603  | 0.900        | 0.725        |
| 0.832        | 0.168        | 3.90                     | 3.01                     | 0.865      | 0.135      | 4.952 | 6.407 | 0.222    | 3.828 | 4.179  | 0.945        | 1.030        |

<sup>a</sup> T = 110 °C, in 0.4 mL toluene; <sup>b</sup>  $([L-LA]+[\varepsilon-CL])/[Cat.] = 200$ ,  $[Cat.] = 25mM$ ; <sup>c</sup> monomer conversion as determined by <sup>1</sup>H NMR spectroscopy; <sup>d</sup> LA and CL composition in the copolymer.

$$r_{LA} = k_{LALA} / k_{LACL} \quad r_{CL} = k_{CLCL} / k_{CLLA} \quad \longrightarrow \quad \frac{d[LA]}{d[CL]} = \frac{[LA]}{[CL]} \frac{r_{LA}[LA] + [CL]}{r_{CL}[CL] + [LA]}$$

$$r_{CL} = \frac{[LA]}{[CL]} \left\{ \frac{d[LA]}{d[CL]} \left( 1 + \frac{r_{LA}[LA]}{[CL]} \right) - 1 \right\}$$

$$\text{define: } y = F_{LA} / F_{CL} \quad x = [LA] / [CL]$$

$$\text{the above formula can be simplified to: } y = x \frac{r_{LA} + 1}{r_{CL} + x}$$

$$\text{conversion: } x - \frac{x}{y} = r_{LA} \frac{x^2}{y} - r_{CL}$$

$$\text{define: } G = x - \frac{x}{y}, \quad F = \frac{x^2}{y}, \quad \alpha = (F_{\min} / F_{\max})^{1/2}$$

$$\text{simplified: } \frac{G}{\alpha + F} = \left( r_{LA} + \frac{r_{CL}}{\alpha} \right) \frac{F}{\alpha + F} - \frac{r_{CL}}{\alpha}$$

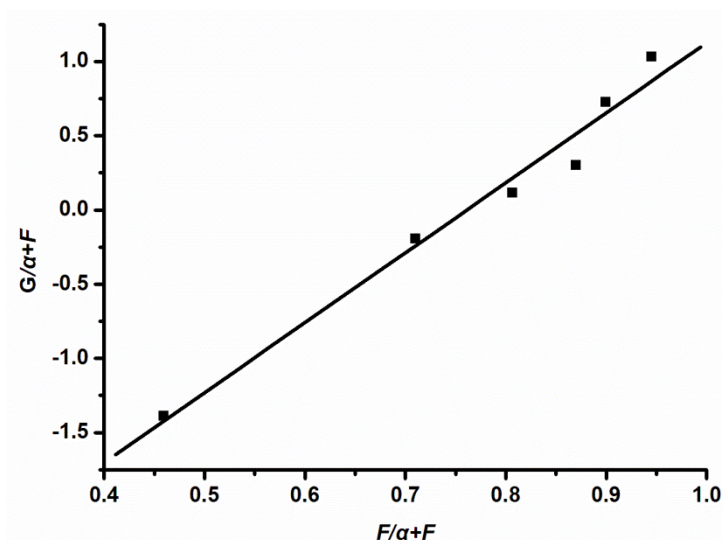

**Figure S5.** linear relationship of  $F/\alpha+F$  and  $G/\alpha+F$  (slope is 4.71, intercept of vertical is 3.59,  $R = 0.988$ )
